# Supplementary material
Source: HighWire-hosted journal article supplement (https://jnm.snmjournals.org/highwire/filestream/95388/field_highwire_adjunct_files/0/210328_Supplemental_Data.pdf)
Supplement: 210328_Supplemental_Data.pdf [file 210328_Supplemental_Data.pdf]

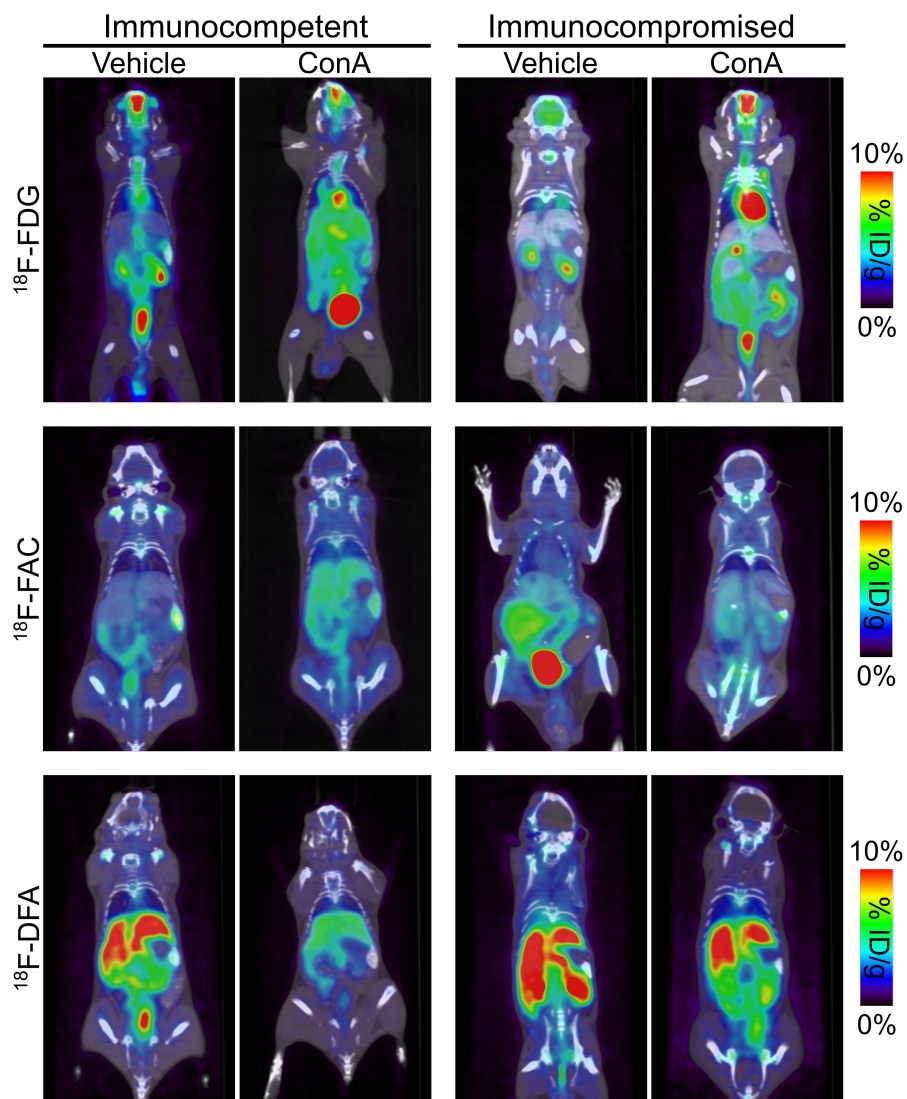

**Figure S1:**  $^{18}\text{F}$ -FDG,  $^{18}\text{F}$ -FAC, and  $^{18}\text{F}$ -DFA accumulation in mice treated with ConA. Representative coronal sections of vehicle- and ConA-treated immunocompetent or immunocompromised mice injected with  $^{18}\text{F}$ -FDG,  $^{18}\text{F}$ -FAC, and  $^{18}\text{F}$ -DFA.

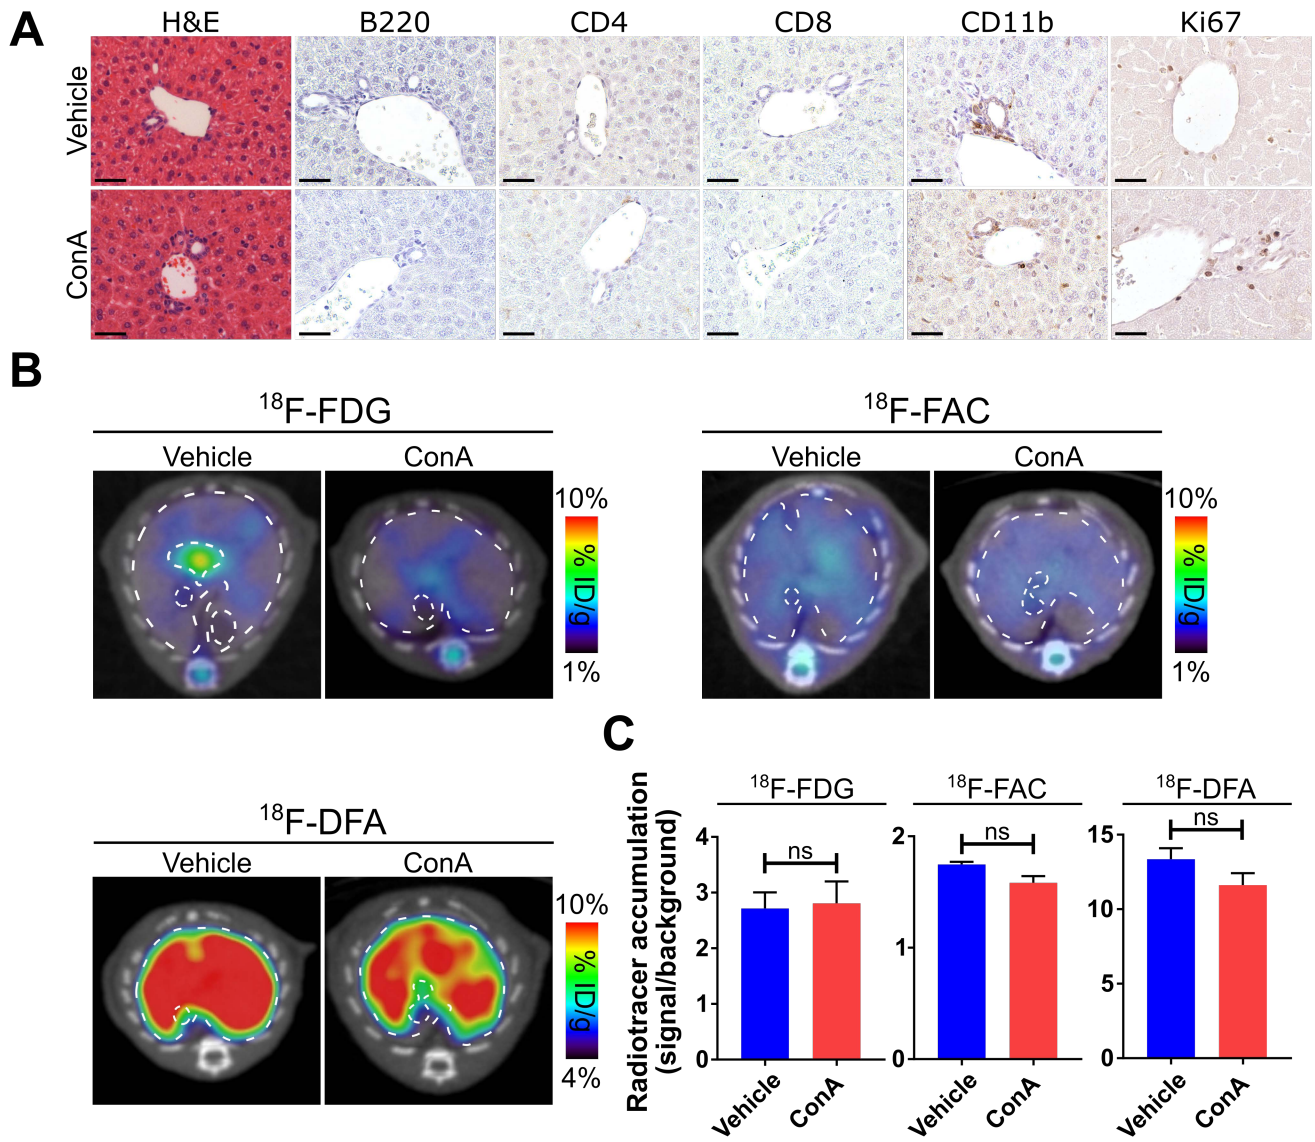

**Figure S2:** Hepatic  $^{18}\text{F-FDG}$ ,  $^{18}\text{F-FAC}$ , and  $^{18}\text{F-DFA}$  accumulation are unaffected in immunocompromised mice treated with ConA. (A) Histochemical and immunohistochemical analyses of liver sections from vehicle- and ConA-treated immunocompromised mice. Scale bars represent 50 microns. Transverse PET/CT images (B) and quantification (C) of vehicle- and ConA-treated immunocompromised mice injected with  $^{18}\text{F-FDG}$ ,  $^{18}\text{F-FAC}$ , and  $^{18}\text{F-DFA}$ . Livers are outlined in a white dotted line. Quantification represents radiotracer accumulation in the liver normalized to a background organ. ns: not significant.

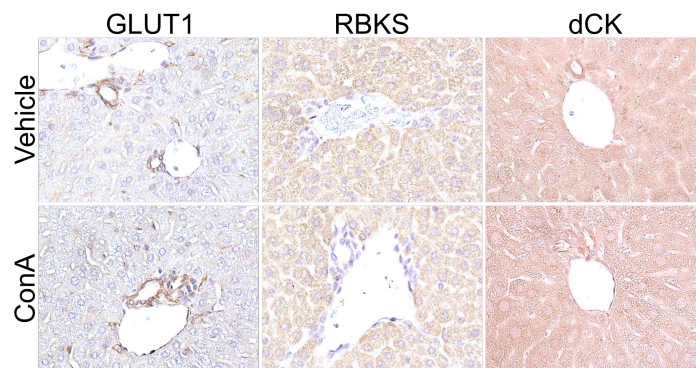

**Figure S3:** GLUT1, RBKS, and dCK protein levels are unaffected in liver sections from immunocompromised mice treated with ConA compared to vehicle-treated mice. GLUT1, RBKS, and dCK immunostained vehicle- and ConA-treated immunocompromised mouse liver sections.

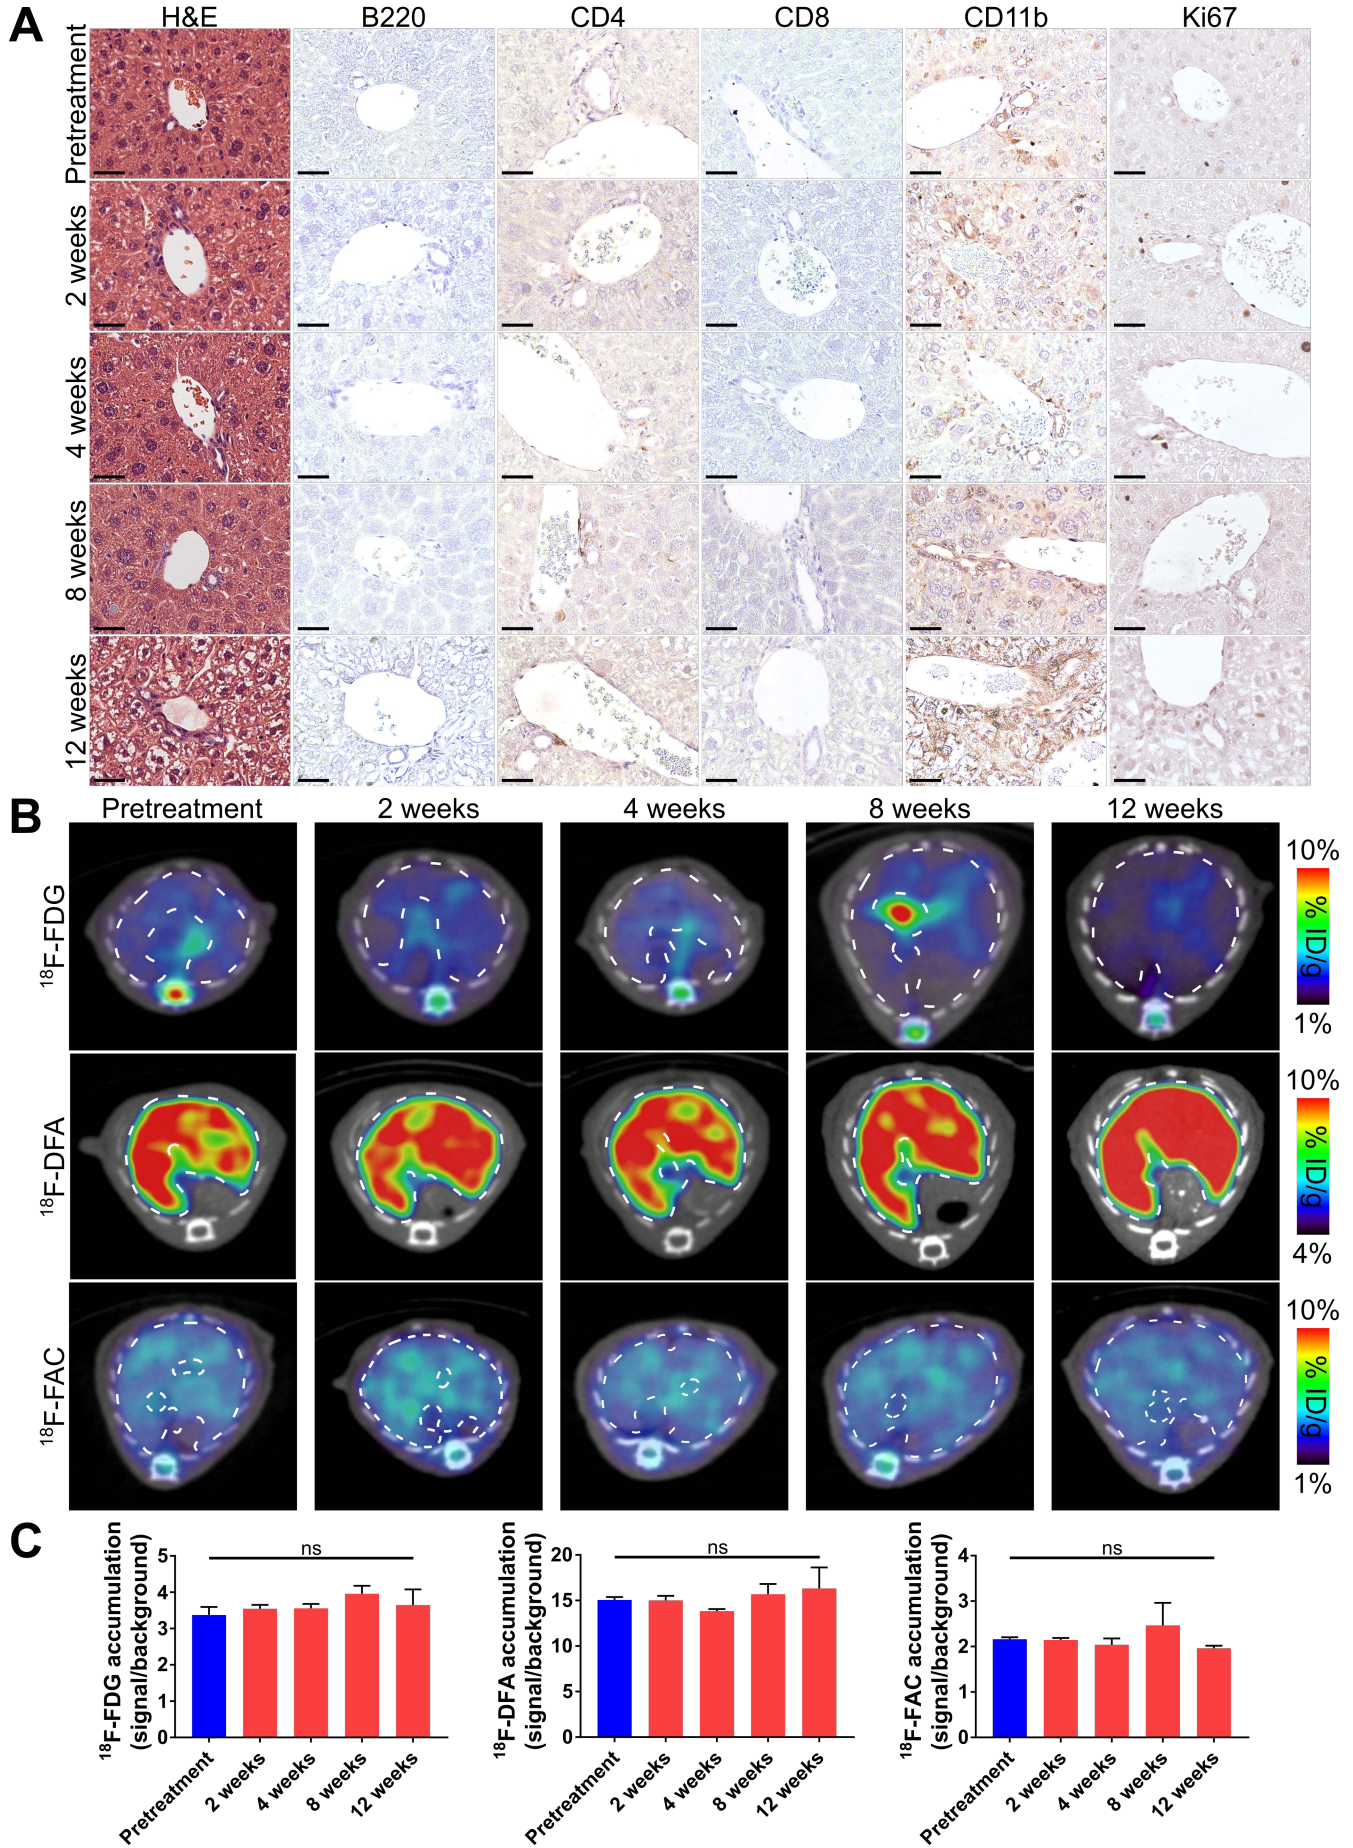

**Figure S4:** Hepatic  $^{18}\text{F}$ -FDG,  $^{18}\text{F}$ -FAC, and  $^{18}\text{F}$ -DFA accumulation are unaffected in immunocompromised mice treated with adenovirus. (A) Histological and immunohistochemical analyses of liver sections from pretreatment and adenovirus-treated immunocompromised mice. Scale bars represent 50 microns. Transverse PET/CT images (B) and quantification (C) of pretreatment and adenovirus-treated immunocompromised mice injected with  $^{18}\text{F}$ -FDG,  $^{18}\text{F}$ -DFA, and  $^{18}\text{F}$ -FAC. Quantification represents radiotracer accumulation in the liver normalized to a background organ. ns: not significant.

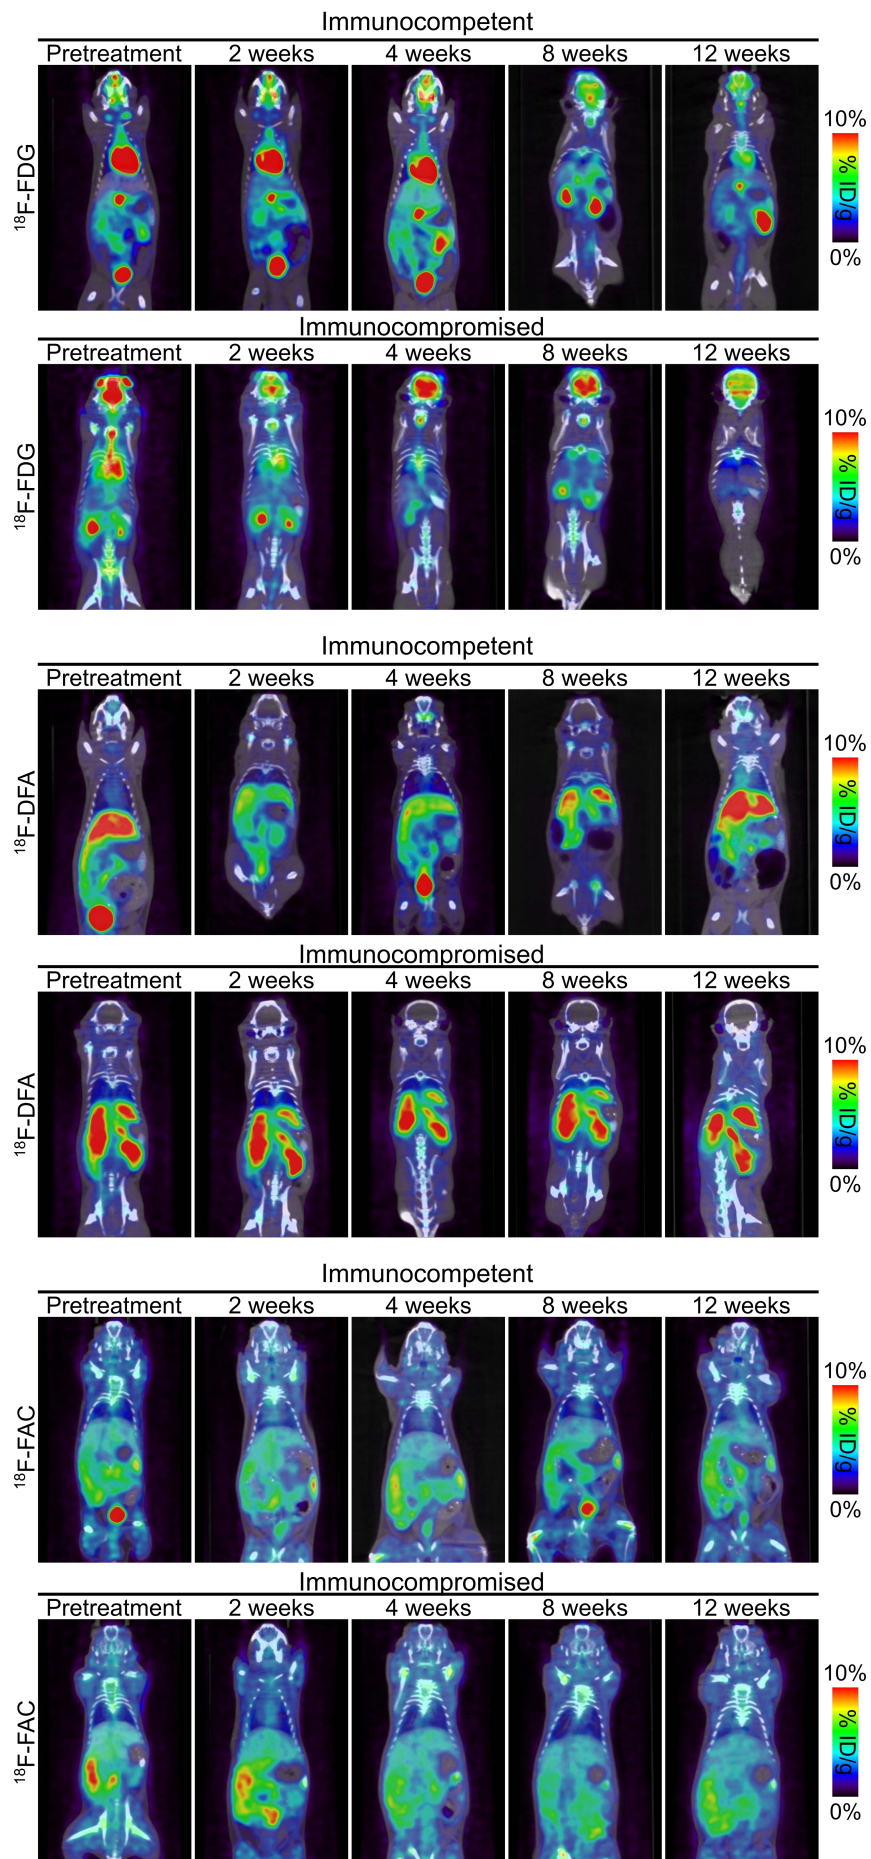

**Figure S5:**  $^{18}\text{F}$ -FDG,  $^{18}\text{F}$ -FAC, and  $^{18}\text{F}$ -DFA accumulation in a mouse model of viral hepatitis. Representative coronal sections of pretreatment and adenovirus-treated mice injected with  $^{18}\text{F}$ -FDG,  $^{18}\text{F}$ -DFA, and  $^{18}\text{F}$ -FAC.
